# Supplementary material for: Combination of Dexmedetomidine and Ketamine for Magnetic Resonance Imaging Sedation
Source: PubMed Central journal article supplement (PMC6492498; doi:10.3389/fneur.2019.00416), 2019-04-24
Supplement: Data_Sheet_1.pdf [file Data_Sheet_1.pdf]

[Supplementary Data]

## **Combination of Dexmedetomidine and Ketamine for Magnetic Resonance Imaging Sedation in Neurocritically Ill Patients**

---

|                               |                                                                                                   |
|-------------------------------|---------------------------------------------------------------------------------------------------|
| <b>Supplementary table 1</b>  | The Richmond Agitation-Sedation Scale                                                             |
| <b>Supplementary table 2</b>  | Doses of agents administered in the MIDA and DEX-KET groups                                       |
| <b>Supplementary table 3</b>  | Doses of agents administered in the MIDA' and DEX-KET groups                                      |
| <b>Supplementary table 4</b>  | Reasons to apply the new MRI sedation protocol in the MIDA and DEX-KET groups                     |
| <b>Supplementary table 5</b>  | Reasons to apply the new MRI sedation protocol in the MIDA' and DEX-KET groups                    |
| <b>Supplementary table 6</b>  | Baseline characteristics of the MIDA' and DEX-KET groups                                          |
| <b>Supplementary table 7</b>  | Changes of vital signs in the MIDA' and DEX-KET groups                                            |
| <b>Supplementary table 8</b>  | Outcomes and complications according to the MRI sedation protocol in the MIDA' and DEX-KET groups |
| <b>Supplementary table 9</b>  | Factors associated with complications following MRI sedation in the MIDA' and DEX-KET groups      |
| <b>Supplementary table 10</b> | MRI sequence and number of images in the MIDA and DEX-KET groups                                  |
| <b>Supplementary table 11</b> | MRI sequence and number of images in the MIDA' and DEX-KET groups                                 |
| <b>Supplementary figure 1</b> | New MRI sedation protocol for patients in the neuro-ICU                                           |
| <b>Supplementary figure 2</b> | Flowchart of the patient selection process for the MIDA' and DEX-KET groups                       |
| <b>Supplementary figure 3</b> | Changes in the level of consciousness before and after administration of sedative agents          |

---

**[Supplementary table 1] The Richmond Agitation-Sedation Scale**

| Score | Term              | Description                                                                                     |
|-------|-------------------|-------------------------------------------------------------------------------------------------|
| 4     | Combative         | Overtly combative or violent; immediate danger to staff                                         |
| 3     | Very agitated     | Pulls on or removes tube(s) or catheter(s) or has aggressive behavior toward staff              |
| 2     | Agitated          | Frequent nonpurposeful movement or patient–ventilator dyssynchrony                              |
| 1     | Restless          | Anxious or apprehensive but movements not aggressive or vigorous                                |
| 0     | Alert and calm    | Spontaneously pays attention to caregiver                                                       |
| -1    | Drowsy            | Not fully alert, but has sustained (more than 10 seconds) awakening, with eye contact, to voice |
| -2    | Light sedation    | Briefly (less than 10 seconds) awakens with eye contact to voice                                |
| -3    | Moderate sedation | Any movement (but no eye contact) to voice                                                      |
| -4    | Deep sedation     | No response to voice, but any movement to physical stimulation                                  |
| -5    | Unarousable       | No response to voice or physical stimulation                                                    |

[Reference] Sessler CN, Gosnell MS, Grap MJ, Brophy GM, O'Neal PV, Keane KA, et al.: The Richmond Agitation-Sedation Scale: validity and reliability in adult intensive care unit patients. *Am J Respir Crit Care Med.* 2002, 166(10):1338-1344.

**[Supplementary table 2]** Doses of agents administered in the MIDA and DEX–KET groups

|                 | MIDA group (n=36)                                                                                     | DEX–KET group (n=36)                                                                                                                                                                                             |
|-----------------|-------------------------------------------------------------------------------------------------------|------------------------------------------------------------------------------------------------------------------------------------------------------------------------------------------------------------------|
| Initial dose    | Midazolam 2 mg (n = 7)<br>Midazolam 3 mg (n = 29)                                                     | DEX 35 µg + KET 35 mg (n = 36)                                                                                                                                                                                   |
| Additional dose | Midazolam 2 mg (n = 6)<br>Midazolam 3 mg (n = 3)<br>Midazolam 5 mg (n = 1)<br>Midazolam 10 mg (n = 1) | DEX 35 µg + KET 35 mg (n = 5)<br>DEX 35 µg + KET 35 mg + midazolam 3 mg (n = 1)<br>DEX 35 µg + KET 35 mg + midazolam 5 mg (n = 1)<br>Midazolam 3 mg (n = 1)<br>Midazolam 5 mg (n = 1)<br>Lorazepam 10 mg (n = 1) |
| Total dose      |                                                                                                       |                                                                                                                                                                                                                  |
| Mean            | Midazolam 3.8 mg                                                                                      | DEX 41.8 µg + KET 41.8 mg                                                                                                                                                                                        |
| Median          | Midazolam 3 mg                                                                                        | DEX 35 µg + KET 35 mg                                                                                                                                                                                            |
| Mode            | Midazolam 3 mg                                                                                        | DEX 35 µg + KET 35 mg                                                                                                                                                                                            |

MRI = magnetic resonance imaging; DEX = dexmedetomidine; KET = ketamine

**[Supplementary table 3]** Doses of agents administered in the MIDA' and DEX–KET groups

|                 | MIDA' group (n=26)                                                          | DEX–KET group (n=36)                                                                                                                                                                                             |
|-----------------|-----------------------------------------------------------------------------|------------------------------------------------------------------------------------------------------------------------------------------------------------------------------------------------------------------|
| Initial dose    | Midazolam 2 mg (n = 4)<br>Midazolam 3 mg (n = 22)                           | DEX 35 µg + KET 35 mg (n = 36)                                                                                                                                                                                   |
| Additional dose | Midazolam 2 mg (n = 6)<br>Midazolam 3 mg (n = 2)<br>Midazolam 10 mg (n = 1) | DEX 35 µg + KET 35 mg (n = 5)<br>DEX 35 µg + KET 35 mg + midazolam 3 mg (n = 1)<br>DEX 35 µg + KET 35 mg + midazolam 5 mg (n = 1)<br>Midazolam 3 mg (n = 1)<br>Midazolam 5 mg (n = 1)<br>Lorazepam 10 mg (n = 1) |
| Total dose      |                                                                             |                                                                                                                                                                                                                  |
| Mean            | Midazolam 3.9 mg                                                            | DEX 41.8 µg + KET 41.8 mg                                                                                                                                                                                        |
| Median          | Midazolam 3 mg                                                              | DEX 35 µg + KET 35 mg                                                                                                                                                                                            |
| Mode            | Midazolam 3 mg                                                              | DEX 35 µg + KET 35 mg                                                                                                                                                                                            |

MRI = magnetic resonance imaging; DEX = dexmedetomidine; KET = ketamine

**[Supplementary table 4] Reasons to apply the new MRI sedation protocol in the MIDA and DEX–KET groups**

|                                                        | MIDA group<br>(n = 36) | DEX–KET<br>group<br>(n = 36) | <i>P</i> value |
|--------------------------------------------------------|------------------------|------------------------------|----------------|
| Agitation (RASS scale $\geq 1$ ) for recent 24 hours   | 9 (25.0)               | 29 (80.6)                    | <0.001         |
| Physical restraints for safety issues                  | 23 (63.9)              | 24 (66.7)                    | 0.600          |
| Recent failure of neuroimaging study                   | 2 (5.6)                | 3 (8.3)                      | 1.000          |
| Recent use of sedative agents for neuroimaging studies | 0 (0)                  | 3 (8.3)                      | 0.238          |

RASS = the Richmond Agitation-Sedation Scale

<sup>a</sup>Results presented as numbers (%).

**[Supplementary table 5]** Reasons to apply the new MRI sedation protocol in the MIDA' and DEX-KET groups

|                                                        | MIDA' group<br>(n = 26) | DEX-KET group<br>(n = 36) | <i>P</i><br>value |
|--------------------------------------------------------|-------------------------|---------------------------|-------------------|
| Agitation (RASS scale $\geq 1$ ) for recent 24 hours   | 9 (34.6)                | 29 (80.6)                 | 0.001             |
| Physical restraints for safety issues                  | 21 (80.8)               | 24 (66.7)                 | 0.159             |
| Recent failure of neuroimaging study                   | 2 (7.7)                 | 3 (8.3)                   | 1.000             |
| Recent use of sedative agents for neuroimaging studies | 0 (0)                   | 3 (8.3)                   | 0.363             |

RASS = the Richmond Agitation-Sedation Scale

<sup>a</sup>Results presented as numbers (%).

**[Supplementary table 6]** Baseline characteristics of the MIDA' and DEX-KET groups

|                                       | MIDA' group<br>(n = 26) | DEX-KET group<br>(n = 36) | <i>P</i> value |
|---------------------------------------|-------------------------|---------------------------|----------------|
| <b>Demographics</b>                   |                         |                           |                |
| Age, years                            | 64.0 (51.0–75.0)        | 72.0 (56.0–77.0)          | 0.222          |
| Sex, male                             | 17 (65.4)               | 14 (38.9)                 | 0.072          |
| Body mass index, kg/m <sup>2</sup>    | 24.4 (22.7–25.7)        | 24.1 (21.9–26.2)          | 0.781          |
| <b>Comorbidities and risk factors</b> |                         |                           |                |
| Hypertension                          | 11 (42.3)               | 21 (58.3)                 | 0.323          |
| Diabetes mellitus                     | 7 (26.9)                | 11 (30.6)                 | 0.978          |
| Hypercholesterolemia                  | 3 (11.5)                | 4 (11.1)                  | 1.000          |
| Atrial fibrillation                   | 7 (26.9)                | 12 (33.3)                 | 0.794          |
| Coronary artery disease               | 3 (11.5)                | 3 (8.3)                   | 1.000          |
| Previous stroke                       | 4 (15.4)                | 5 (13.9)                  | 1.000          |
| Cancer                                | 2 (7.7)                 | 3 (8.3)                   | 1.000          |
| Smoking                               | 10 (38.5)               | 13 (36.1)                 | 1.000          |
| Alcohol consumption                   | 11 (42.3)               | 10 (27.8)                 | 0.357          |
| <b>Diagnosis on admission</b>         |                         |                           |                |
| Stroke                                | 16 (61.5)               | 30 (83.3)                 | 0.101          |
| CNS infection                         | 4 (15.4)                | 4 (11.1)                  | 0.911          |
| Seizure or status epilepticus         | 4 (15.4)                | 2 (5.6)                   | 0.392          |
| Demyelinating disease                 | 2 (7.7)                 | 0 (0)                     | 0.335          |
| <b>Clinical status on admission</b>   |                         |                           |                |
| Glasgow Coma Scale                    | 12.0 (11.0–14.0)        | 12.0 (10.0–14.0)          | 0.868          |
| APACHE-II score                       | 11.5 (9.0–17.0)         | 15.5 (12.5–19.5)          | 0.014          |

MIDA = midazolam; DEX-KET = a combination of dexmedetomidine and ketamine; CNS = central nervous system; APACHE-II = Acute Physiology and Chronic Health Enquiry II; MRI = magnetic resonance imaging

<sup>a</sup>Results presented as numbers (%) or medians (interquartile range).

**[Supplementary table 7]** Changes of vital signs in the MIDA' and DEX-KET groups

|                          | MIDA' group<br>(n = 26) | DEX-KET group<br>(n = 36) | <i>P</i> value |
|--------------------------|-------------------------|---------------------------|----------------|
| Systolic blood pressure  |                         |                           |                |
| Time 0                   | 134.0 (117.0–154.0)     | 133.5 (124.5–148.0)       | 0.549          |
| Time 1                   | 129.0 (112.0–147.0)     | 135.0 (127.0–153.5)       | 0.140          |
| Time 2                   | 122.0 (108.0–141.0)     | 127.5 (113.0–140.5)       | 0.633          |
| Diastolic blood pressure |                         |                           |                |
| Time 0                   | 76.0 (64.0–81.0)        | 75.0 (61.5–86.0)          | 0.920          |
| Time 1                   | 76.0 (65.0–81.0)        | 76.0 (62.0–87.5)          | 0.612          |
| Time 2                   | 71.5 (65.0–83.0)        | 70.0 (58.5–80.0)          | 0.607          |
| Heart rate               |                         |                           |                |
| Time 0                   | 86.5 (75.0–96.0)        | 85.5 (66.0–94.5)          | 0.284          |
| Time 1                   | 90.5 (78.0–98.0)        | 79.5 (66.0–92.5)          | 0.078          |
| Time 2                   | 83.0 (71.0–93.0)        | 71.0 (59.0–87.5)          | 0.035          |
| Respiratory rate         |                         |                           |                |
| Time 0                   | 18.5 (15.0–20.0)        | 19.0 (16.5–21.5)          | 0.367          |
| Time 1                   | 20.0 (18.0–21.0)        | 19.0 (16.5–23.0)]         | 0.960          |
| Time 2                   | 19.0 (18.0–20.0)        | 16.5 (14.0–20.5)          | 0.051          |
| Oxygen saturation        |                         |                           |                |
| Time 0                   | 98.0 (97.0–100.0)       | 98.0 (96.0–99.5)          | 0.632          |
| Time 1                   | 97.0 (94.0–98.0)        | 97.0 (96.0–99.5)          | 0.207          |
| Time 2                   | 99.0 (98.0–100.0)       | 98.0 (96.0–99.5)          | 0.232          |

<sup>a</sup>Time 0 = immediately before administration of sedative agents; time 1 = immediately after bolus infusion of sedative agents; time 2 = soon after returning to the neurological intensive care unit

<sup>b</sup>Results presented as a median (interquartile range).



**[Supplementary table 8]** Outcomes and complications according to the MRI sedation protocol in the MIDA' and DEX-KET groups

|                                      | MIDA' group<br>(n = 26) | DEX-KET group<br>(n = 36) | <i>P</i><br>value |
|--------------------------------------|-------------------------|---------------------------|-------------------|
| Outcomes relevant to MRI sedation    |                         |                           |                   |
| Success in MRI sedation              | 22 (84.6)               | 33 (91.7)                 | 0.646             |
| MRI scan time, min                   | 100.0 (87.0–110.0)      | 53.5 (45.0–60.5)          | <0.001            |
| Length of neuro-ICU stay, day        | 3.0 (2.0–5.0)           | 4.0 (3.0–6.0)             | 0.082             |
| Complications following MRI sedation |                         |                           |                   |
| Oxygen desaturation                  | 4 (15.4)                | 1 (2.8)                   | 0.185             |
| Hypotension                          | 1 (3.8)                 | 0 (0)                     | 0.869             |
| Cardiorespiratory arrest             | 0 (0)                   | 0 (0)                     | 1.000             |
| Aspiration pneumonia                 | 13 (50.0)               | 7 (19.4)                  | 0.024             |

MRI = magnetic resonance imaging; neuro-ICU = neurological intensive care unit.

<sup>a</sup>Results presented as a number (%) or median (interquartile ranges)

**[Supplementary table 9]** Factors associated with complications following MRI sedation in the MIDA' (n = 26) and DEX-KET (n = 36) groups

|                                       | Univariable       |                | Multivariable    |                |
|---------------------------------------|-------------------|----------------|------------------|----------------|
|                                       | analysis          | <i>P</i> value | analysis         | <i>P</i> value |
|                                       | OR (95% CI)       |                | AOR (95% CI)     |                |
| <b>Demographics</b>                   |                   |                |                  |                |
| Age, years                            | 1.00 (0.97–1.03)  | 0.964          |                  |                |
| Sex, male                             | 1.15 (0.41–3.22)  | 0.793          |                  |                |
| Body mass index, kg/m <sup>2</sup>    | 0.94 (0.80–1.10)  | 0.422          |                  |                |
| <b>Comorbidities and risk factors</b> |                   |                |                  |                |
| Hypertension                          | 0.79 (0.28–2.21)  | 0.647          |                  |                |
| Diabetes mellitus                     | 0.62 (0.22–1.74)  | 0.128          |                  |                |
| Hypercholesterolemia                  | 1.31 (0.27–6.47)  | 0.738          |                  |                |
| Atrial fibrillation                   | 0.71 (0.23–2.22)  | 0.551          |                  |                |
| Coronary artery disease               | 0.31 (0.03–2.83)  | 0.298          |                  |                |
| Previous stroke                       | 0.18 (0.02–1.51)  | 0.112          | 0.05 (0.04–0.72) | 0.028          |
| Cancer                                | 2.78 (0.43–18.01) | 0.285          |                  |                |
| Smoking                               | 0.32 (0.10–1.05)  | 0.060          | 0.22 (0.05–0.90) | 0.035          |
| Alcohol consumption                   | 0.57 (0.18–1.75)  | 0.323          |                  |                |
| <b>Diagnosis on admission</b>         |                   |                |                  |                |
| Stroke                                | 0.24 (0.07–0.78)  | 0.018          |                  |                |
| CNS infection                         | 3.33 (0.72–15.54) | 0.125          |                  |                |
| Seizure or status epilepticus         | 1.80 (0.33–9.77)  | 0.496          |                  |                |
| <b>Demyelinating disease</b>          |                   |                |                  |                |
| <b>Clinical status on admission</b>   |                   |                |                  |                |
| Glasgow Coma Scale                    | 0.85 (0.68–1.06)  | 0.128          | 0.76 (0.58–1.01) | 0.062          |
| APACHE-II score                       | 1.01 (0.92–1.11)  | 0.866          |                  |                |
| MRI sedation, DEX-KET                 | 0.21 (0.07–0.63)  | 0.006          | 0.12 (0.03–0.46) | 0.002          |

MRI = magnetic resonance imaging; CNS = central nervous system; APACHE-II = Acute Physiology and Chronic Health Enquiry II; OR = odds ratio; AOR = adjusted odds ratio

**[Supplementary table 10]** MRI sequence and number of images in the MIDA and DEX-KET groups

|                                         | MIDA group<br>(n = 36) | DEX-KET group<br>(n = 36) |
|-----------------------------------------|------------------------|---------------------------|
| DWI                                     | 30 (83.3%)             | 36 (100.0%)               |
| FLAIR                                   | 26 (72.2%)             | 35 (97.2%)                |
| GRE                                     | 24 (66.7%)             | 34 (94.4%)                |
| SWI                                     | 11 (30.6%)             | 10 (27.8%)                |
| MIP                                     | 1 (2.8%)               | 1 (2.8%)                  |
| TOF                                     | 19 (52.8%)             | 27 (75.0%)                |
| T1WI                                    | 13 (36.1%)             | 8 (22.2%)                 |
| T2WI                                    | 15 (41.7%)             | 8 (22.2%)                 |
| T1E                                     | 14 (38.9%)             | 8 (22.2%)                 |
| PWI                                     | 1 (2.8%)               | 1 (2.8%)                  |
| CE-MRA                                  | 8 (22.2%)              | 6 (16.7%)                 |
| Number of MRI images<br>in each patient | 150.0 (150.0–357.0)    | 150.0 (150.0–300.0)       |

MRI = magnetic resonance imaging; DWI = diffusion-weighted imaging; FLAIR = fluid-attenuated inversion recovery; GRE = gradient-echo imaging; SWI = susceptibility-weighted imaging; MIP = maximum intensity projection imaging; TOF = time-of-flight imaging; T1WI = T1-weighted imaging; T2WI = T2-weighted imaging; T1E = T1-enhanced imaging; PWI = perfusion-weighted imaging; CE-MRA = contrast-enhanced magnetic resonance imaging

**[Supplementary table 11]** MRI sequence and number of images in the MIDA' and DEX-KET groups

|                                         | MIDA' group<br>(n = 26) | DEX-KET group<br>(n = 36) |
|-----------------------------------------|-------------------------|---------------------------|
| DWI                                     | 23 (88.5%)              | 36 (100.0%)               |
| FLAIR                                   | 19 (73.1%)              | 35 (97.2%)                |
| GRE                                     | 17 (65.4%)              | 34 (94.4%)                |
| SWI                                     | 9 (34.6%)               | 10 (27.8%)                |
| MPI                                     | 1 (3.8%)                | 1 (2.8%)                  |
| TOF                                     | 14 (53.8%)              | 27 (75.0%)                |
| T1WI                                    | 9 (34.6%)               | 8 (22.2%)                 |
| T2WI                                    | 11 (42.3%)              | 8 (22.2%)                 |
| T1E                                     | 9 (34.6%)               | 8 (22.2%)                 |
| PWI                                     | 1 (3.8%)                | 1 (2.8%)                  |
| CE-MRA                                  | 4 (15.4%)               | 6 (16.7%)                 |
| Number of MRI images<br>in each patient | 150.0 (150.0–355.0)     | 150.0 (150.0–300.0)       |

MRI = magnetic resonance imaging; DWI = diffusion-weighted imaging; FLAIR = fluid-attenuated inversion recovery; GRE = gradient-echo imaging; SWI = susceptibility-weighted imaging; MIP = maximum intensity projection imaging; TOF = time-of-flight imaging; T1WI = T1-weighted imaging; T2WI = T2-weighted imaging; T1E = T1-enhanced imaging; PWI = perfusion-weighted imaging; CE-MRA = contrast-enhanced magnetic resonance imaging

[Supplementary figure 1] New MRI sedation protocol for patients in the neuro-ICU

Ver. August 1, 2016

**MRI Sedation Protocol for Patients in the Neuro-ICU**

Name: ID: DATE:

**1. Inclusion criteria (for MRI sedation)**

- Agitation (RASS scale  $\geq 1$ ) for recent 24 hr
- Physical restraints
- Recent failure to neuroimaging study
- Recent use of sedative agents for neuroimaging studies

**2. Exclusion criteria (for a combination of dexmedetomidine and ketamine)**

- QTc prolongation  $>550$  ms
- Second/third degree AV block
- Severe heart failure
- Intractable hypertension/hypotension
- Allergy to dexmedetomidine or ketamine

**3. Sedation regimen**

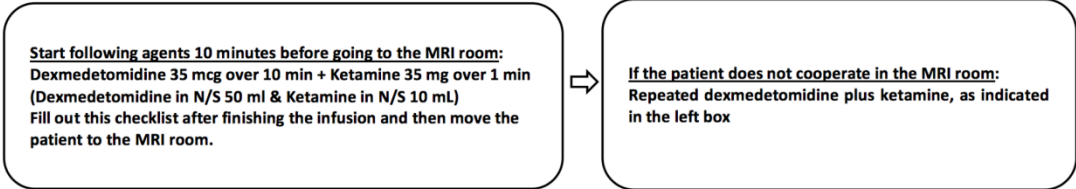

**4. Checklist**

|                                                                                              | Right before administering protocol medication | Immediately after administering protocol medication (= right before moving the patient to the MRI room) | Immediately after returning to the neuro-ICU |
|----------------------------------------------------------------------------------------------|------------------------------------------------|---------------------------------------------------------------------------------------------------------|----------------------------------------------|
| RASS scale (-5 ~ +4)                                                                         |                                                |                                                                                                         |                                              |
| Systolic BP (mmHg)                                                                           |                                                |                                                                                                         |                                              |
| Diastolic BP (mmHg)                                                                          |                                                |                                                                                                         |                                              |
| Heart rate (/min)                                                                            |                                                |                                                                                                         |                                              |
| Respiratory rate (/min)                                                                      |                                                |                                                                                                         |                                              |
| SpO <sub>2</sub> (%)                                                                         |                                                |                                                                                                         |                                              |
| <input type="checkbox"/> Use of additional dose of sedative agents in MRI rooms specify: ( ) |                                                |                                                                                                         |                                              |

\* Notify to the duty doctor of the neuro-ICU if systolic BP  $< 90$  mmHg; systolic BP  $> 200$  mmHg; change of heart rate by more than 40/min; heart rate  $< 40$ /min; heart rate  $> 130$ /min; or SpO<sub>2</sub>  $< 90\%$ .

**5. Success or failure**

- Protocol success (completion of all MRI sequences as ordered)
- Protocol failure (no completion of all MRI sequences as ordered)

[Supplementary figure 2] Flowchart of the patient selection process in the MIDA' and DEX-KET groups

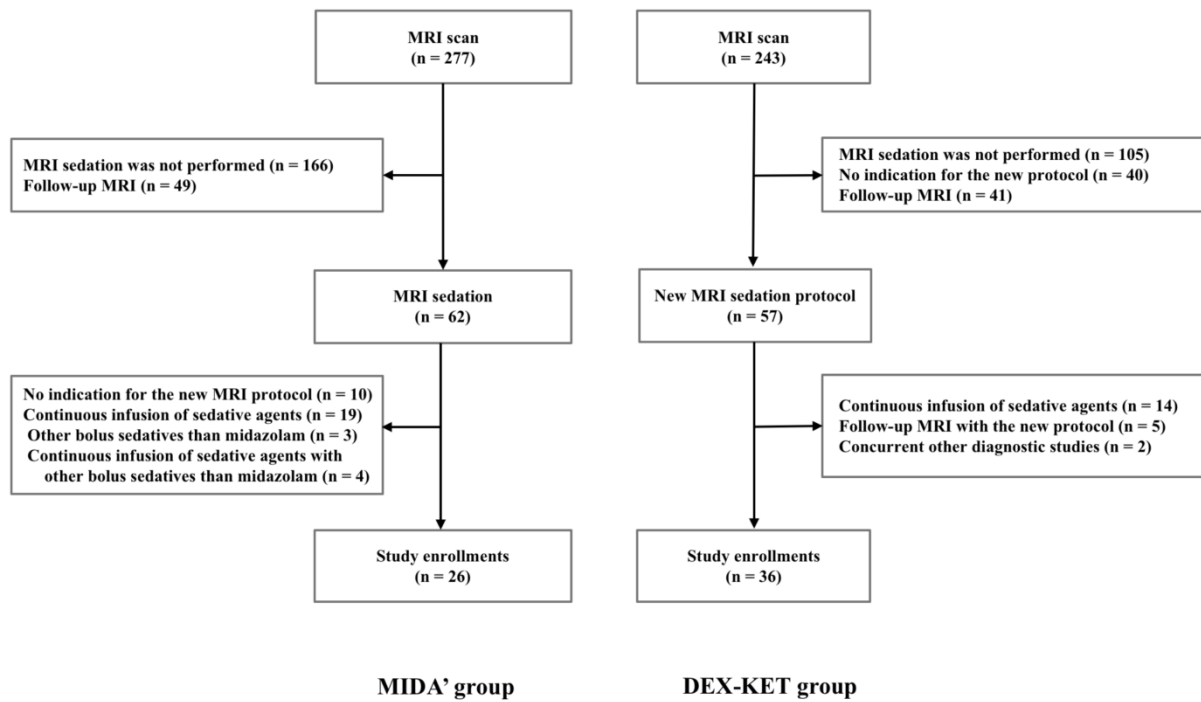

In the left side of the figure, 10 more patients who did not meet inclusion criteria and met exclusion criteria for the new MRI protocol were excluded as compared with Figure 1.

Inclusion and exclusion criteria for the new MRI protocol in Supplemental Figure 1.

[Supplementary figure 3] Changes in the level of consciousness before and after administration of sedative agents

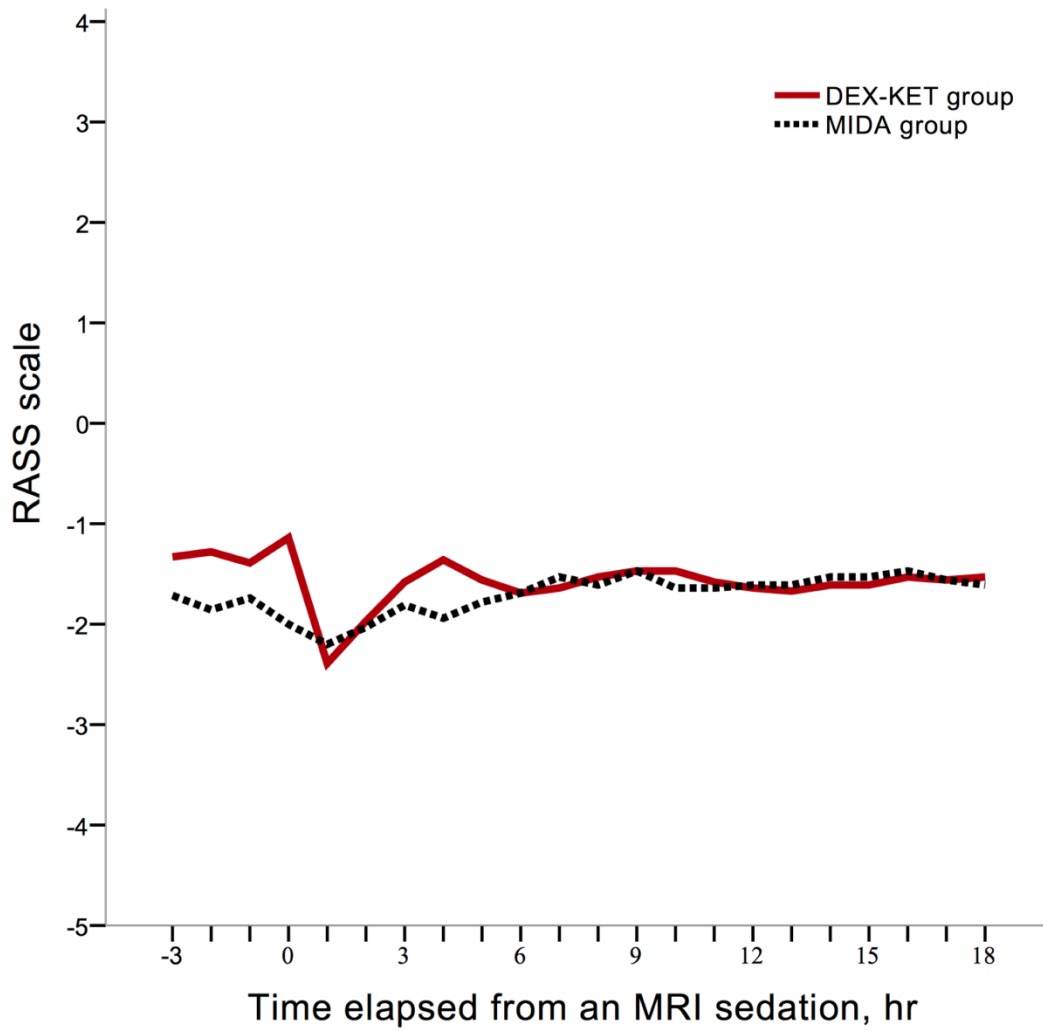

RASS = the Richmond Agitation-Sedation Scale; MRI = magnetic resonance imaging
